# Supplementary material
Source: PubMed Central journal article supplement (PMC4524881)
Supplement: NIHMS576052-supplement-supplement_1.pdf [file NIHMS576052-supplement-supplement_1.pdf]

**APPENDIX****OBESITY, ABDOMINAL OBESITY, PHYSICAL ACTIVITY, AND CALORIC INTAKE IN U.S. ADULTS:  
1988-2010**

Uri Ladabaum, M.D., M.S.,<sup>1,2</sup> Ajitha Mannalithara, Ph.D.,<sup>1,2</sup> Parvathi A. Myer, M.D., M.H.S.,<sup>1,2</sup>  
Gurkirpal Singh, M.D.,<sup>1,2</sup>

<sup>1</sup>Division of Gastroenterology and Hepatology, <sup>2</sup>Department of Medicine,  
Stanford University School of Medicine, Stanford, CA

- Page 2: Definition of Leisure-Time Physical Activity Levels
- Page 3: Trends in Body-Mass Index: Joinpoint Analyses
- Pages 3-5: Sensitivity Analyses: Effect of Physical Activity on Body-Mass Index and Waist Circumference (Methods and Results)
- Pages 6-7: Appendix Table 1: Trends in average body-mass index, waist circumference, and prevalence of obesity and abdominal obesity, U.S. adults stratified by race/ethnicity, 1988-2010
- Pages 8-9: Appendix Table 2: Annual changes in prevalence of abdominal obesity, stratified by obesity category based on body-mass index, U.S. adults, 1988-2010
- Pages 10-11: Appendix Table 3. Trends in reported levels of leisure-time physical activity and daily caloric intake, U.S. adults, stratified by race/ethnicity, 1988-2010
- Pages 12-13: Appendix Table 4: Annual changes in mean body-mass index, mean waist circumference and daily caloric intake, stratified by reported level of leisure-time physical activity, U.S. adults, 1988-2010
- Page 14: Appendix Table 5: Relative increase in body-mass index and waist circumference in “Intermediate” and “No reported” groups compared to “Ideal” reported leisure time physical activity in U.S. adults, 1988-2010.
- Pages 15-16: Appendix Table 6: Annual changes in daily intake of fat, carbohydrate and protein, stratified by reported level of leisure-time physical activity, U.S. adults, 1988-2010.

- Page 17: Appendix Figure 1. Trends in prevalence of obesity in U.S. adult women (A) and men (B), by racial/ethnic group.
- Page 18: Appendix Figure 2. Trends in prevalence of abdominal obesity in U.S. adult women (A) and men (B), by racial/ethnic group.
- Page 19: References

### ***Definition of Leisure-Time Physical Activity Levels***

During the home interview component of NHANES, a physical activity questionnaire was administered. In NHANES-III, participants were asked to record the frequency of leisure-time activities in the past month in terms of times per month. Each activity was given an intensity rating, reflecting the ratio of energy expenditure relative to that of the resting metabolic rate in MET (metabolic equivalent of task). In NHANES 1999-2000 to 2005-2006, participants were asked to report the frequency, duration and level of exertion for each of the reported leisure-time activities in the past month. MET scores were assigned for each activity. From NHANES 2007-2008 onwards, participants were asked to report the number of days per week that they engaged in moderate or vigorous leisure-time activities and the duration of these activities per day. The MET score thresholds used to define moderate and vigorous activity were 4 and 8, respectively.

To define the physical activity levels of participants, different approaches were followed for NHANES-III and for the continuous NHANES waves, as NHANES-III did not consider duration of the activities. For NHANES-III, based on the MET scores, the intensity of activities was defined as moderate (3-6 METS) or vigorous (>6 METS). An ideal level of physical activity was defined as engaging in moderate activities five or more times per week or in vigorous activities three or more times per week.<sup>1</sup> An intermediate level of physical activity was defined as engaging in at least some leisure-time physical activities without meeting the criteria for the ideal group.

For continuous NHANES surveys, the number of minutes of moderate activity per week and the number of minutes of vigorous activity per week were calculated based on the reported frequency, intensity and duration of activities. An ideal level of physical activity was defined as

$\geq 150$  minutes per week of moderate activities, or  $\geq 75$  minutes per week of vigorous activities, or  $\geq 150$  minutes per week of a combination of moderate and vigorous activities.<sup>2</sup> An intermediate level of physical activity was defined as 1 to 149 minutes per week of moderate activities, or 1 to 74 minutes per week of vigorous activities, or 1 to 149 minutes per week of a combination of moderate and vigorous activities.

### ***Trends in Body-Mass Index: Joinpoint Analyses***

Trends in age-adjusted mean BMI over time were analyzed using joinpoint regression program version 4.0.1 from the National Cancer Institute,<sup>3,4</sup> as previously used in similar analyses.<sup>5</sup> Joinpoint regression methodology is widely used to identify statistically significant changes in trends. The joinpoint program determines the number of joinpoints (a time point at which the direction or magnitude of trend changes), tests if the change in the trend is significant by performing permutation tests and fits a log-linear model to each segment. The specifications set in advance were: maximum number of joinpoints was set to 1, minimum number of observations for a joinpoint from the beginning or end of data series was set to 3. The slope of a line segment is described as the annual percentage change (APC).

### ***Sensitivity Analyses: Effect of Physical Activity on Body-Mass Index and Waist***

#### ***Circumference***

##### ***Methods***

To further tease out effect of physical activity on BMI and waist circumference, we performed a sensitivity analysis using only the continuous NHANES data, in which the number of minutes of participation in physical activity are available. To estimate total minutes spent on

physical activity, we calculated intensity-adjusted leisure-time physical activity minutes per week based on the recommendations given in Physical Activity Guidelines for Americans: Appendix 1 (<http://www.health.gov/paguidelines/guidelines/appendix1>), which states that “1 minute of vigorous-intensity activity counts the same as 2 minutes of moderate-intensity activity.” The intensity-adjusted total minutes were top-truncated to 1,680 minutes/week. We performed the multivariate regression analysis with log transformed BMI and waist circumference as the response variables, and year, intensity-adjusted leisure-time physical activity minutes per week and calorie intake as the explanatory variables, and adjusted for age, age squared and gender. Analyses were performed for all adults and also after stratification by gender.

To compare the trends with any physical activity or leisure-time physical activity as an explanatory variable, we performed a sub-analysis using only NHANES data from 1999-2000 to 2005-2006 as the physical activity questionnaires were consistent in these survey cycles. Any physical activity includes walking or bicycling for transport, activities around the home or yard information, as well as leisure-time physical activity.

### *Results*

The results of these sensitivity analyses were similar to the results of the primary analyses.

BMI increased significantly over the years in both women (APC 0.21, 95% CI 0.03 - 0.38) and men (APC 0.35, 95% CI 0.17 - 0.53) after adjusting for physical activity, caloric intake, and age. The level of physical activity was associated with the degree of increase in BMI. In contrast, the effect of caloric intake was not significant.

In women, BMI decreased by 0.94% (95% CI, 0.76-1.1%) for every 100 minutes/week increase in physical activity. In men, BMI decreased by 0.24% (95% CI, 0.11-0.36%) for every 100 minutes/week increase in physical activity.

Waist circumference increased significantly over the years in both women (APC 0.31, 95% CI 0.15 - 0.46) and men (APC 0.19, 95% CI 0.06 - 0.32) after adjusting for physical activity, caloric intake, and age. The level of physical activity was associated with the degree of increase in waist circumference. In contrast, the effect of caloric intake was not significant.

In women, waist circumference decreased by 0.79% (95% CI, 0.66-0.91%) for every 100 minutes/week increase in physical activity. In men, waist circumference decreased by 0.32% (95% CI, 0.23-0.42%) for every 100 minutes/week increase in physical activity.

In the analyses restricted to NHANES data from 1999-2000 to 2005-2006, average BMI, average waist circumference, prevalence of obesity, and prevalence of abdominal obesity all increased significantly only in the subgroup with no physical activity. The trends were comparable with any physical activity or leisure-time physical activity as an explanatory variable.

Appendix Table 1. Trends in average body-mass index, waist circumference, and prevalence of obesity and abdominal obesity, U.S. adults stratified by race/ethnicity, 1988-2010

|                                        | Body mass index and waist circumference            |                                         | Category based on body-mass index |                                     |                                        | Category based on waist circumference      |
|----------------------------------------|----------------------------------------------------|-----------------------------------------|-----------------------------------|-------------------------------------|----------------------------------------|--------------------------------------------|
|                                        | Mean body mass index in kg/m <sup>2</sup> (95% CI) | Mean waist circumference in cm (95% CI) | Obese, % of population (95% CI)   | Overweight, % of population(95% CI) | Normal weight, % of population(95% CI) | Abdominal obesity, % of population(95% CI) |
| <b>Women</b>                           |                                                    |                                         |                                   |                                     |                                        |                                            |
| 18-39 years, non-Hispanic white        |                                                    |                                         |                                   |                                     |                                        |                                            |
| 1988-1994                              | 24.6 (24.1-25.0)                                   | 82.0 (80.9-83.2)                        | 17.7 (14.9-20.5)                  | 16.4 (14.2-18.7)                    | 60.5 (57.2-63.8)                       | 25.9 (21.8-30.0)                           |
| 2009-2010                              | 27.1 (26.4-27.8)                                   | 90.4 (88.3-92.5)                        | 26.6 (22.6-30.7)                  | 23.4 (16.6-30.3)                    | 46.4 (40.5-52.4)                       | 46.3 (39.7-52.9)                           |
| Trend                                  | APC 0.48 (0.32-0.64)                               | APC 0.52 (0.39-0.65)                    | OR 1.031 (1.015-1.048)            | OR 1.019 (1.004-1.035)              | OR 0.970 (0.958-0.983)                 | OR 1.048 (1.032-1.065)                     |
| 40-64 years, non-Hispanic white        |                                                    |                                         |                                   |                                     |                                        |                                            |
| 1988-1994                              | 27.3 (26.8-27.8)                                   | 91.5 (90.3-92.6)                        | 27.5 (24.0-31.1)                  | 28.8 (26.1-31.5)                    | 41.0 (37.4-44.7)                       | 52.7 (49.6-55.8)                           |
| 2009-2010                              | 28.5 (27.9-29.1)                                   | 96.4 (95.1-97.7)                        | 35.6 (30.7-40.5)                  | 28.1 (23.0-33.2)                    | 33.0 (29.0-36.9)                       | 66.0 (61.7-70.4)                           |
| Trend                                  | APC 0.25 (0.12-0.38)                               | APC 0.30 (0.20-0.40)                    | OR 1.021 (1.007-1.035)            | OR 0.998 (0.985-1.012)              | OR 0.981 (0.970-0.993)                 | OR 1.032 (1.021-1.044)                     |
| 65 years and older, non-Hispanic white |                                                    |                                         |                                   |                                     |                                        |                                            |
| 1988-1994                              | 26.3 (26.1-26.6)                                   | 92.9 (91.8-93.9)                        | 22.4 (20.0-24.8)                  | 32.5 (30.3-34.7)                    | 41.5 (38.3-44.6)                       | 63.1 (59.1-67.1)                           |
| 2009-2010                              | 29.0 (28.2-29.8)                                   | 98.4 (97.2-99.6)                        | 37.6 (32.4-42.8)                  | 32.0 (26.5-37.5)                    | 28.3 (24.6-32.0)                       | 73.6 (70.3-76.9)                           |
| Trend                                  | APC 0.38 (0.27-0.50)                               | APC 0.26 (0.17-0.35)                    | OR 1.028 (1.015-1.041)            | OR 1.006 (0.994-1.017)              | OR 0.975 (0.964-0.986)                 | OR 1.026 (1.011-1.041)                     |
| 18-39 years, non-Hispanic black        |                                                    |                                         |                                   |                                     |                                        |                                            |
| 1988-1994                              | 27.4 (26.8-27.9)                                   | 87.6 (86.3-88.9)                        | 28.7 (25.4-31.9)                  | 25.9 (23.4-28.4)                    | 41.8 (37.7-45.9)                       | 42.1 (38.1-46.2)                           |
| 2009-2010                              | 31.1 (29.5-32.7)                                   | 96.5 (92.2-100.7)                       | 54.1 (44.3-63.8)                  | 18.8 (13.5-24.0)                    | 23.6 (17.2-30.0)                       | 65.7 (54.3-77.1)                           |
| Trend                                  | APC 0.64 (0.44-0.84)                               | APC 0.51 (0.35-0.66)                    | OR 1.051 (1.034-1.068)            | OR 0.990 (0.977-1.004)              | OR 0.952 (0.937-0.968)                 | OR 1.049 (1.030-1.068)                     |
| 40-64 years, non-Hispanic black        |                                                    |                                         |                                   |                                     |                                        |                                            |
| 1988-1994                              | 30.3 (29.7-30.9)                                   | 98.0 (96.5-99.5)                        | 46.8 (42.1-51.4)                  | 30.0 (26.5-33.6)                    | 20.9 (16.8-24.9)                       | 72.3 (67.8-76.9)                           |
| 2009-2010                              | 33.8 (32.3-35.2)                                   | 104.6 (102.8-106.3)                     | 61.4 (55.0-67.7)                  | 27.3 (22.0-32.5)                    | 10.4 (6.8-14.0)                        | 83.9 (76.7-91.1)                           |
| Trend                                  | APC 0.39 (0.21-0.57)                               | APC 0.29 (0.17-0.41)                    | OR 1.024 (1.009-1.038)            | OR 0.991 (0.977-1.005)              | OR 0.974 (0.956-0.993)                 | OR 1.024 (1.002-1.047)                     |
| 65 years and older, non-Hispanic black |                                                    |                                         |                                   |                                     |                                        |                                            |
| 1988-1994                              | 29.1 (28.4-29.8)                                   | 97.9 (96.1-99.7)                        | 36.3 (31.6-40.9)                  | 36.1 (31.3-40.8)                    | 25.1 (21.5-28.8)                       | 75.7 (70.8-80.7)                           |
| 2009-2010                              | 31.4 (29.9-33.0)                                   | 100.7 (98.1-103.4)                      | 55.6 (44.4-66.7)                  | 25.8 (16.1-35.5)                    | 17.1 (9.8-24.5)                        | 81.9 (72.0-91.8)                           |
| Trend                                  | APC 0.35 (0.12-0.57)                               | APC 0.18 (0.03-0.32)                    | OR 1.042 (1.020-1.065)            | OR 0.968 (0.947-0.990)              | OR 0.983 (0.961-1.006)                 | OR 1.024 (0.995-1.054)                     |
| 18-39 years, Mexican-American          |                                                    |                                         |                                   |                                     |                                        |                                            |
| 1988-1994                              | 26.9 (26.5-27.3)                                   | 86.7 (85.8-87.7)                        | 26.6 (23.4-29.8)                  | 30.2 (25.8-34.6)                    | 40.5 (37.2-43.7)                       | 42.5 (39.9-45.2)                           |
| 2009-2010                              | 28.8 (27.9-29.6)                                   | 94.3 (91.8-96.8)                        | 36.8 (32.1-41.6)                  | 29.3 (24.2-34.5)                    | 33.2 (26.8-39.6)                       | 60.5 (51.3-69.7)                           |
| Trend                                  | APC 0.40 (0.24-0.57)                               | APC 0.51 (0.38-0.65)                    | OR 1.031 (1.014-1.049)            | OR 0.998 (0.983-1.014)              | OR 0.976 (0.961-0.990)                 | OR 1.051 (1.031-1.071)                     |
| 40-64 years, Mexican-American          |                                                    |                                         |                                   |                                     |                                        |                                            |
| 1988-1994                              | 29.7 (29.0-30.3)                                   | 96.4 (95.2-97.6)                        | 43.6 (39.3-48.0)                  | 33.7 (30.2-37.3)                    | 22.2 (17.3-27.2)                       | 74.4 (70.6-78.2)                           |
| 2009-2010                              | 31.0 (30.1-31.9)                                   | 100.0 (97.5-102.6)                      | 54.2 (45.7-62.7)                  | 36.0 (27.4-44.6)                    | 9.4 (5.5-13.2)                         | 84.6 (78.6-90.6)                           |
| Trend                                  | APC 0.21 (0.02-0.40)                               | APC 0.19 (0.04-0.35)                    | OR 1.022 (1.001-1.044)            | OR 1.000 (0.980-1.021)              | OR 0.964 (0.943-0.986)                 | OR 1.029 (1.004-1.054)                     |
| 65 years and older, Mexican-American   |                                                    |                                         |                                   |                                     |                                        |                                            |
| 1988-1994                              | 28.0 (27.1-28.9)                                   | 97.0 (94.5-99.6)                        | 29.7 (23.1-36.4)                  | 38.8 (31.1-46.5)                    | 30.3 (23.0-37.6)                       | 72.7 (64.5-80.9)                           |
| 2009-2010                              | 29.3 (28.6-29.9)                                   | 98.8 (97.5-100.1)                       | 35.7 (27.0-44.4)                  | 41.0 (31.0-51.0)                    | 21.6 (15.8-27.3)                       | 82.2 (73.2-91.2)                           |
| Trend                                  | APC 0.26 (0.04-0.48)                               | APC 0.18 (-0.01-0.37)                   | OR 1.017 (0.991-1.043)            | OR 1.006 (0.981-1.031)              | OR 0.975 (0.951-1.001)                 | OR 1.039 (1.001-1.078)                     |
| <b>Men</b>                             |                                                    |                                         |                                   |                                     |                                        |                                            |
| 18-39 years, non-Hispanic white        |                                                    |                                         |                                   |                                     |                                        |                                            |

|                                        |                      |                      |                        |                        |                        |                        |
|----------------------------------------|----------------------|----------------------|------------------------|------------------------|------------------------|------------------------|
| 1988-1994                              | 25.7 (25.3-26.1)     | 91.0 (90.2-91.9)     | 14.4 (12.1-16.7)       | 34.7 (31.3-38.1)       | 49.1 (45.8-52.4)       | 15.2 (12.8-17.5)       |
| 2009-2010                              | 27.8 (27.0-28.5)     | 96.2 (94.1-98.2)     | 33.1 (25.7-40.4)       | 30.4 (26.7-34.0)       | 35.4 (28.3-42.5)       | 30.6 (24.0-37.1)       |
| Trend                                  | APC 0.35 (0.23-0.47) | APC 0.26 (0.18-0.35) | OR 1.051 (1.034-1.069) | OR 0.994 (0.983-1.006) | OR 0.972 (0.960-0.984) | OR 1.045 (1.030-1.060) |
| 40-64 years, non-Hispanic white        |                      |                      |                        |                        |                        |                        |
| 1988-1994                              | 27.6 (27.2-27.9)     | 99.8 (99.1-100.5)    | 25.5 (22.8-28.2)       | 44.1 (40.8-47.3)       | 29.8 (26.3-33.3)       | 38.7 (35.2-42.2)       |
| 2009-2010                              | 29.3 (28.7-29.9)     | 104.2 (102.7-105.7)  | 36.6 (31.7-41.5)       | 44.5 (38.3-50.8)       | 18.1 (12.9-23.3)       | 51.3 (45.9-56.7)       |
| Trend                                  | APC 0.33 (0.22-0.43) | APC 0.25 (0.18-0.33) | OR 1.030 (1.018-1.043) | OR 1.000 (0.987-1.012) | OR 0.963 (0.948-0.978) | OR 1.033 (1.020-1.047) |
| 65 years and older, non-Hispanic white |                      |                      |                        |                        |                        |                        |
| 1988-1994                              | 26.7 (26.4-27.1)     | 101.0 (100.2-101.9)  | 20.5 (17.3-23.8)       | 45.3 (41.5-49.0)       | 32.5 (28.9-36.1)       | 46.7 (43.2-50.2)       |
| 2009-2010                              | 28.9 (28.4-29.4)     | 106.7 (105.6-107.8)  | 37.3 (31.3-43.3)       | 39.3 (33.9-44.8)       | 22.3 (18.8-25.8)       | 62.1 (57.6-66.6)       |
| Trend                                  | APC 0.40 (0.30-0.49) | APC 0.30 (0.24-0.37) | OR 1.043 (1.027-1.059) | OR 0.992 (0.979-1.004) | OR 0.970 (0.958-0.982) | OR 1.040 (1.030-1.051) |
| 18-39 years, non-Hispanic black        |                      |                      |                        |                        |                        |                        |
| 1988-1994                              | 26.1 (25.7-26.4)     | 87.8 (87.0-88.6)     | 18.8 (16.7-21.0)       | 31.1 (28.1-34.0)       | 48.3 (44.8-51.8)       | 13.9 (12.2-15.5)       |
| 2009-2010                              | 28.9 (27.6-30.2)     | 92.8 (90.2-95.4)     | 35.2 (26.6-43.9)       | 27.1 (20.3-33.8)       | 35.7 (30.2-41.1)       | 28.0 (19.8-36.1)       |
| Trend                                  | APC 0.52 (0.36-0.68) | APC 0.36 (0.24-0.48) | OR 1.052 (1.035-1.071) | OR 0.995 (0.981-1.008) | OR 0.967 (0.955-0.979) | OR 1.052 (1.033-1.072) |
| 40-64 years, non-Hispanic black        |                      |                      |                        |                        |                        |                        |
| 1988-1994                              | 27.0 (26.7-27.4)     | 95.3 (94.2-96.5)     | 22.4 (18.8-25.9)       | 41.6 (37.7-45.6)       | 34.4 (30.9-38.0)       | 27.9 (24.2-31.6)       |
| 2009-2010                              | 30.0 (29.0-30.9)     | 102.3 (100.1-104.4)  | 42.9 (36.8-49.0)       | 31.7 (26.1-37.2)       | 24.8 (19.9-29.7)       | 41.1 (35.5-46.6)       |
| Trend                                  | APC 0.49 (0.33-0.65) | APC 0.33 (0.21-0.44) | OR 1.053 (1.034-1.072) | OR 0.981 (0.967-0.994) | OR 0.970 (0.956-0.985) | OR 1.035 (1.020-1.051) |
| 65 years and older, non-Hispanic black |                      |                      |                        |                        |                        |                        |
| 1988-1994                              | 26.0 (25.4-26.6)     | 96.9 (95.4-98.3)     | 20.7 (16.5-25.0)       | 35.9 (31.5-40.2)       | 38.4 (33.1-43.8)       | 34.2 (29.2-39.3)       |
| 2009-2010                              | 28.0 (26.8-29.1)     | 102.6 (99.6-105.6)   | 32.9 (23.6-42.2)       | 34.7 (28.5-41.0)       | 30.4 (23.6-37.2)       | 54.8 (46.8-62.9)       |
| Trend                                  | APC 0.48 (0.27-0.70) | APC 0.37 (0.21-0.52) | OR 1.045 (1.020-1.071) | OR 0.995 (0.979-1.012) | OR 0.971 (0.950-0.992) | OR 1.052 (1.030-1.074) |
| 18-39 years, Mexican-American          |                      |                      |                        |                        |                        |                        |
| 1988-1994                              | 26.0 (25.6-26.5)     | 89.8 (88.6-90.9)     | 15.0 (11.8-18.2)       | 40.6 (37.1-44.2)       | 43.1 (38.9-47.3)       | 13.5 (9.9-17.0)        |
| 2009-2010                              | 28.4 (27.3-29.6)     | 96.6 (93.8-99.4)     | 30.5 (23.5-37.4)       | 44.5 (42.0-46.9)       | 24.4 (17.6-31.2)       | 31.8 (23.0-40.6)       |
| Trend                                  | APC 0.50 (0.33-0.68) | APC 0.40 (0.27-0.54) | OR 1.048 (1.024-1.072) | OR 1.010 (0.997-1.024) | OR 0.954 (0.937-0.971) | OR 1.051 (1.026-1.077) |
| 40-64 years, Mexican-American          |                      |                      |                        |                        |                        |                        |
| 1988-1994                              | 28.5 (28.1-28.9)     | 100.0 (98.9-101.1)   | 33.4 (28.9-37.8)       | 45.0 (40.7-49.2)       | 21.1 (17.9-24.4)       | 40.5 (35.9-45.1)       |
| 2009-2010                              | 29.5 (29.0-30.0)     | 102.0 (100.4-103.5)  | 38.7 (32.8-44.7)       | 47.8 (41.0-54.6)       | 13.5 (10.6-16.4)       | 44.6 (37.2-52.1)       |
| Trend                                  | APC 0.22 (0.08-0.36) | APC 0.16 (0.05-0.27) | OR 1.019 (1.000-1.040) | OR 1.004 (0.988-1.020) | OR 0.968 (0.949-0.987) | OR 1.017 (0.996-1.038) |
| 65 years and older, Mexican-American   |                      |                      |                        |                        |                        |                        |
| 1988-1994                              | 26.7 (26.1-27.3)     | 99.1 (97.6-100.5)    | 19.8 (14.0-25.6)       | 47.7 (40.0-55.4)       | 31.0 (25.5-36.5)       | 40.0 (31.6-48.4)       |
| 2009-2010                              | 29.0 (27.2-30.8)     | 104.8 (102.1-107.4)  | 36.1 (20.7-51.5)       | 47.1 (35.9-58.2)       | 16.9 (6.5-27.3)        | 58.7 (49.7-67.7)       |
| Trend                                  | APC 0.44 (0.11-0.77) | APC 0.31 (0.16-0.46) | OR 1.057 (1.010-1.106) | OR 0.993 (0.966-1.021) | OR 0.960 (0.930-0.992) | OR 1.040 (1.013-1.069) |



Appendix Table 2: Annual changes in prevalence of abdominal obesity, stratified by obesity category based on body-mass index, U.S. adults, 1988-2010

|                    | Abdominal obesity, % of population<br>(95% CI) |                   | Abdominal obesity category based on waist<br>circumference,<br>Odds ratio (95% CI) of being in category in any<br>given year compared to previous year |
|--------------------|------------------------------------------------|-------------------|--------------------------------------------------------------------------------------------------------------------------------------------------------|
|                    | 1988-1994                                      | 2009-2010         |                                                                                                                                                        |
| <b>Women</b>       |                                                |                   |                                                                                                                                                        |
| Obese              |                                                |                   |                                                                                                                                                        |
| 18 years and older | 96.4 (94.5-98.3)                               | 99.6 (99.1-100.0) | 1.144 (1.090-1.200)                                                                                                                                    |
| 18-39 years        | 92.5 (87.5-97.5)                               | 99.2 (97.9-100.0) | 1.155 (1.083-1.232)                                                                                                                                    |
| 40-64 years        | 98.5 (97.6-99.4)                               | 99.9 (99.7-100.0) | 1.130 (1.068-1.195)                                                                                                                                    |
| 65 years and older | 99.8 (99.4-100.0)                              | 99.5 (98.4-100.0) | 0.907 (0.707-1.164)                                                                                                                                    |
| Overweight         |                                                |                   |                                                                                                                                                        |
| 18 years and older | 66.1 (62.7-69.4)                               | 80.8 (78.1-83.5)  | 1.045 (1.032-1.057)                                                                                                                                    |
| 18-39 years        | 47.2 (39.9-54.5)                               | 69.8 (62.7-76.9)  | 1.051 (1.030-1.072)                                                                                                                                    |
| 40-64 years        | 71.9 (67.3-76.5)                               | 85.6 (80.4-90.7)  | 1.044 (1.025-1.063)                                                                                                                                    |
| 65 years and older | 85.4 (81.9-88.9)                               | 86.4 (81.7-91.1)  | 1.026 (0.998-1.055)                                                                                                                                    |
| Normal weight      |                                                |                   |                                                                                                                                                        |
| 18 years and older | 9.6 (8.1-11.0)                                 | 13.8 (10.1-17.5)  | 1.026 (1.012-1.040)                                                                                                                                    |
| 18-39 years        | 2.6 (1.2-4.0)                                  | 5.6 (3.2-8.1)     | 1.042 (1.011-1.075)                                                                                                                                    |
| 40-64 years        | 13.4 (10.8-16.1)                               | 17.2 (10.6-23.7)  | 1.018 (0.995-1.042)                                                                                                                                    |
| 65 years and older | 28.3 (24.2-32.4)                               | 31.4 (26.8-36.0)  | 1.009 (0.993-1.026)                                                                                                                                    |
| <b>Men</b>         |                                                |                   |                                                                                                                                                        |
| Obese              |                                                |                   |                                                                                                                                                        |
| 18 years and older | 89.4 (86.7-92.1)                               | 91.1 (89.7-92.5)  | 1.012 (0.991-1.033)                                                                                                                                    |
| 18-39 years        | 79.7 (74.3-85.1)                               | 81.5 (77.6-85.5)  | 1.004 (0.977-1.032)                                                                                                                                    |
| 40-64 years        | 94.7 (91.5-97.8)                               | 95.7 (94.1-97.4)  | 1.017 (0.978-1.057)                                                                                                                                    |
| 65 years and older | 97.0 (94.4-99.7)                               | 98.9 (97.2-100.0) | 1.062 (0.978-1.152)                                                                                                                                    |
| Overweight         |                                                |                   |                                                                                                                                                        |
| 18 years and older | 24.5 (22.1-26.8)                               | 27.8 (24.3-31.3)  | 1.017 (1.007-1.027)                                                                                                                                    |
| 18-39 years        | 8.6 (6.2-11.0)                                 | 10.4 (5.9-14.9)   | 1.012 (0.991-1.033)                                                                                                                                    |
| 40-64 years        | 31.4 (27.8-35.0)                               | 29.7 (24.5-34.9)  | 1.007 (0.993-1.022)                                                                                                                                    |
| 65 years and older | 52.1 (47.8-56.4)                               | 61.7 (55.5-68.0)  | 1.028 (1.013-1.044)                                                                                                                                    |

| Normal weight      |               |               |                     |
|--------------------|---------------|---------------|---------------------|
| 18 years and older | 0.7 (0.4-1.0) | 0.2 (0.0-0.5) | 0.979 (0.951-1.008) |
| 18-39 years        | -- *          | -- *          | -- *                |
| 40-64 years        | 1.2 (0.2-2.2) | 0.5 (0.0-1.2) | 0.946 (0.904-0.990) |
| 65 years and older | 3.4 (1.7-5.2) | 0.3 (0.0-0.8) | 0.992 (0.954-1.031) |

\* Small sample size precludes estimation

Appendix Table 3. Trends in reported levels of leisure-time physical activity and daily caloric intake, U.S. adults, stratified by race/ethnicity, 1988-2010

|                                        | Reported leisure-time physical activity |                                                 |                                         | Mean energy intake<br>in kcal/day(95% CI) |
|----------------------------------------|-----------------------------------------|-------------------------------------------------|-----------------------------------------|-------------------------------------------|
|                                        | None,<br>% of population (95% CI)       | Intermediate level,<br>% of population (95% CI) | Ideal level,<br>% of population(95% CI) |                                           |
| <b>Women</b>                           |                                         |                                                 |                                         |                                           |
| 18-39 years, non-Hispanic white        |                                         |                                                 |                                         |                                           |
| 1988-1994                              | 10.4 (8.2-12.6)                         | 51.3 (46.9-55.7)                                | 38.3 (34.2-42.4)                        | 1939 (1874-2005)                          |
| 2009-2010                              | 41.3 (34.9-47.7)                        | 21.9 (17.5-26.4)                                | 36.8 (31.5-42.1)                        | 1861 (1820-1903)                          |
| Trend                                  | OR 1.080 (1.061-1.100)                  | OR 0.933 (0.920-0.945)                          | OR 1.010 (0.996-1.024)                  | APC -0.16 (-0.38-0.06)                    |
| 40-64 years, non-Hispanic white        |                                         |                                                 |                                         |                                           |
| 1988-1994                              | 15.2 (12.7-17.8)                        | 48.6 (45.8-51.4)                                | 36.2 (32.1-40.2)                        | 1715 (1685-1746)                          |
| 2009-2010                              | 43.4 (38.4-48.4)                        | 21.3 (18.0-24.7)                                | 35.2 (31.5-39.0)                        | 1795 (1708-1882)                          |
| Trend                                  | OR 1.077 (1.056-1.099)                  | OR 0.936 (0.925-0.948)                          | OR 0.995 (0.980-1.011)                  | APC 0.17 (-0.08-0.42)                     |
| 65 years and older, non-Hispanic white |                                         |                                                 |                                         |                                           |
| 1988-1994                              | 29.3 (25.8-32.7)                        | 30.9 (28.0-33.9)                                | 39.8 (35.3-44.3)                        | 1491 (1459-1523)                          |
| 2009-2010                              | 64.2 (58.0-70.4)                        | 12.1 (7.9-16.3)                                 | 23.7 (18.0-29.4)                        | 1607 (1523-1690)                          |
| Trend                                  | OR 1.073 (1.055-1.090)                  | OR 0.957 (0.945-0.970)                          | OR 0.957 (0.940-0.974)                  | APC 0.40 (0.18-0.62)                      |
| 18-39 years, non-Hispanic black        |                                         |                                                 |                                         |                                           |
| 1988-1994                              | 19.5 (16.2-22.8)                        | 47.4 (43.8-51.0)                                | 33.0 (29.4-36.7)                        | 1970 (1915-2025)                          |
| 2009-2010                              | 59.9 (54.1-65.8)                        | 19.4 (13.7-25.1)                                | 20.7 (15.8-25.5)                        | 1957 (1790-2125)                          |
| Trend                                  | OR 1.070 (1.055-1.086)                  | OR 0.936 (0.922-0.949)                          | OR 0.989 (0.975-1.004)                  | APC -0.14 (-0.52-0.24)                    |
| 40-64 years, non-Hispanic black        |                                         |                                                 |                                         |                                           |
| 1988-1994                              | 33.0 (28.7-37.3)                        | 39.6 (35.5-43.8)                                | 27.4 (23.1-31.6)                        | 1645 (1587-1703)                          |
| 2009-2010                              | 71.1 (64.0-78.2)                        | 14.3 (10.2-18.3)                                | 14.6 (8.4-20.8)                         | 1728 (1613-1843)                          |
| Trend                                  | OR 1.064 (1.046-1.083)                  | OR 0.948 (0.933-0.964)                          | OR 0.972 (0.954-0.990)                  | APC 0.41 (0.02-0.79)                      |
| 65 years and older, non-Hispanic black |                                         |                                                 |                                         |                                           |
| 1988-1994                              | 51.3 (44.7-57.9)                        | 30.1 (25.2-35.0)                                | 18.6 (13.5-23.7)                        | 1340 (1261-1419)                          |
| 2009-2010                              | 69.7 (61.4-77.9)                        | 18.0 (11.7-24.3)                                | 12.4 (3.7-21.1)                         | 1509 (1298-1720)                          |
| Trend                                  | OR 1.040 (1.015-1.066)                  | OR 0.962 (0.938-0.985)                          | OR 0.980 (0.949-1.011)                  | APC 0.56 (-0.03-1.15)                     |
| 18-39 years, Mexican-American          |                                         |                                                 |                                         |                                           |
| 1988-1994                              | 29.9 (26.6-33.3)                        | 44.0 (40.8-47.2)                                | 26.0 (22.2-29.9)                        | 1873 (1833-1913)                          |
| 2009-2010                              | 57.2 (49.4-65.0)                        | 16.7 (12.2-21.2)                                | 26.1 (18.5-33.7)                        | 1844 (1698-1990)                          |
| Trend                                  | OR 1.056 (1.034-1.079)                  | OR 0.934 (0.917-0.952)                          | OR 1.002 (0.981-1.024)                  | APC -0.10 (-0.51-0.30)                    |
| 40-64 years, Mexican-American          |                                         |                                                 |                                         |                                           |
| 1988-1994                              | 30.8 (27.7-33.9)                        | 42.8 (39.2-46.4)                                | 26.4 (22.7-30.0)                        | 1697 (1621-1772)                          |
| 2009-2010                              | 70.3 (60.3-80.2)                        | 9.6 (3.9-15.3)                                  | 20.1 (13.2-27.1)                        | 1733 (1595-1872)                          |
| Trend                                  | OR 1.088 (1.063-1.114)                  | OR 0.917 (0.897-0.937)                          | OR 0.975 (0.954-0.997)                  | APC 0.18 (-0.37-0.72)                     |
| 65 years and older, Mexican-American   |                                         |                                                 |                                         |                                           |
| 1988-1994                              | 47.2 (41.5-53.0)                        | 28.9 (23.0-34.8)                                | 23.8 (16.9-30.7)                        | 1271 (1198-1344)                          |
| 2009-2010                              | 80.2 (74.1-86.3)                        | 6.8 (3.6-10.0)                                  | 13.0 (5.9-20.0)                         | 1455 (1381-1528)                          |
| Trend                                  | OR 1.081 (1.058-1.105)                  | OR 0.934 (0.909-0.959)                          | OR 0.950 (0.918-0.984)                  | APC 0.77 (0.20-1.35)                      |
| <b>Men</b>                             |                                         |                                                 |                                         |                                           |
| 18-39 years, non-Hispanic white        |                                         |                                                 |                                         |                                           |
| 1988-1994                              | 7.3 (5.5-9.1)                           | 46.0 (42.2-49.8)                                | 46.7 (42.6-50.7)                        | 3050 (2965-3134)                          |

|                                        |                        |                        |                        |                         |
|----------------------------------------|------------------------|------------------------|------------------------|-------------------------|
| 2009-2010                              | 28.6 (21.6-35.6)       | 16.7 (12.0-21.4)       | 54.7 (45.7-63.8)       | 2773 (2632-2913)        |
| Trend                                  | OR 1.064 (1.042-1.085) | OR 0.936 (0.922-0.949) | OR 1.016 (1.001-1.032) | APC -0.38 (-0.63--0.12) |
| 40-64 years, non-Hispanic white        |                        |                        |                        |                         |
| 1988-1994                              | 9.1 (6.8-11.3)         | 48.0 (44.0-52.0)       | 42.9 (39.5-46.3)       | 2547 (2472-2621)        |
| 2009-2010                              | 43.9 (40.7-47.1)       | 17.3 (13.5-21.0)       | 38.8 (33.7-44.0)       | 2590 (2497-2682)        |
| Trend                                  | OR 1.107 (1.085-1.130) | OR 0.928 (0.915-0.942) | OR 0.983 (0.970-0.997) | APC 0.17 (-0.05-0.40)   |
| 65 years and older, non-Hispanic white |                        |                        |                        |                         |
| 1988-1994                              | 16.3 (13.9-18.7)       | 35.3 (32.6-38.1)       | 48.4 (44.9-51.8)       | 2013 (1957-2069)        |
| 2009-2010                              | 54.9 (50.2-59.5)       | 12.8 (9.7-15.9)        | 32.3 (28.5-36.2)       | 2018 (1951-2085)        |
| Trend                                  | OR 1.094 (1.079-1.109) | OR 0.942 (0.931-0.954) | OR 0.962 (0.951-0.972) | APC -0.03 (-0.28-0.22)  |
| 18-39 years, non-Hispanic black        |                        |                        |                        |                         |
| 1988-1994                              | 6.7 (4.6-8.7)          | 35.9 (32.9-38.8)       | 57.4 (53.9-61.0)       | 2917 (2800-3034)        |
| 2009-2010                              | 37.6 (28.9-46.3)       | 5.3 (1.4-9.3)          | 57.0 (46.3-67.7)       | 2510 (2388-2632)        |
| Trend                                  | OR 1.070 (1.047-1.093) | OR 0.922 (0.908-0.937) | OR 1.004 (0.987-1.022) | APC -0.56 (-0.85--0.26) |
| 40-64 years, non-Hispanic black        |                        |                        |                        |                         |
| 1988-1994                              | 19.6 (15.8-23.4)       | 42.3 (37.9-46.7)       | 38.1 (34.2-42.0)       | 2314 (2226-2403)        |
| 2009-2010                              | 57.4 (48.3-66.5)       | 11.8 (7.2-16.4)        | 30.8 (23.5-38.0)       | 2593 (2285-2901)        |
| Trend                                  | OR 1.070 (1.050-1.091) | OR 0.928 (0.913-0.944) | OR 0.987 (0.970-1.003) | APC 0.58 (0.08-1.08)    |
| 65 years and older, non-Hispanic black |                        |                        |                        |                         |
| 1988-1994                              | 29.6 (22.5-36.7)       | 35.0 (28.9-41.2)       | 35.4 (29.0-41.7)       | 1651 (1559-1744)        |
| 2009-2010                              | 71.9 (63.5-80.3)       | 9.9 (1.4-18.4)         | 18.2 (10.3-26.1)       | 1912 (1803-2021)        |
| Trend                                  | OR 1.080 (1.056-1.103) | OR 0.939 (0.913-0.965) | OR 0.957 (0.934-0.980) | APC 1.04 (0.43-1.65)    |
| 18-39 years, Mexican-American          |                        |                        |                        |                         |
| 1988-1994                              | 19.5 (15.2-23.8)       | 42.0 (37.0-46.9)       | 38.6 (34.3-42.8)       | 2792 (2697-2887)        |
| 2009-2010                              | 52.8 (42.6-63.1)       | 10.7 (4.6-16.9)        | 36.4 (29.9-43.0)       | 2613 (2442-2784)        |
| Trend                                  | OR 1.052 (1.032-1.074) | OR 0.914 (0.895-0.934) | OR 1.018 (1.001-1.036) | APC -0.35 (-0.72-0.03)  |
| 40-64 years, Mexican-American          |                        |                        |                        |                         |
| 1988-1994                              | 24.2 (20.0-28.5)       | 44.3 (40.5-48.0)       | 31.5 (27.7-35.3)       | 2424 (2364-2484)        |
| 2009-2010                              | 63.2 (53.6-72.9)       | 13.5 (8.5-18.5)        | 23.3 (16.2-30.3)       | 2409 (2240-2578)        |
| Trend                                  | OR 1.080 (1.055-1.106) | OR 0.919 (0.900-0.938) | OR 0.976 (0.955-0.997) | APC 0.21 (-0.30-0.71)   |
| 65 years and older, Mexican-American   |                        |                        |                        |                         |
| 1988-1994                              | 32.1 (25.6-38.6)       | 28.8 (22.5-35.1)       | 39.1 (32.4-45.8)       | 1777 (1657-1897)        |
| 2009-2010                              | 59.4 (48.2-70.6)       | 12.0 (5.4-18.6)        | 28.6 (22.0-35.3)       | 1919 (1693-2144)        |
| Trend                                  | OR 1.061 (1.029-1.095) | OR 0.947 (0.919-0.976) | OR 0.968 (0.941-0.997) | APC 0.45 (-0.21-1.11)   |

Appendix Table 4: Annual changes in mean body-mass index, mean waist circumference and daily caloric intake, stratified by reported level of leisure-time physical activity, U.S. adults, 1988-2010

|                                                               | Mean body mass index<br>in kg/m <sup>2</sup> (95% CI) |                     |                                            | Mean waist circumference<br>in cm (95% CI) |                       |                                            | Mean energy intake<br>in kcal/day(95% CI) |                     |                                            |
|---------------------------------------------------------------|-------------------------------------------------------|---------------------|--------------------------------------------|--------------------------------------------|-----------------------|--------------------------------------------|-------------------------------------------|---------------------|--------------------------------------------|
|                                                               | 1988-1994                                             | 2009-2010           | Annual<br>percentage<br>change (95%<br>CI) | 1988-1994                                  | 2009-2010             | Annual<br>percentage<br>change (95%<br>CI) | 1988-1994                                 | 2009-2010           | Annual<br>percentage<br>change (95%<br>CI) |
| <b>Women</b>                                                  |                                                       |                     |                                            |                                            |                       |                                            |                                           |                     |                                            |
| No reported leisure-time physical activity                    |                                                       |                     |                                            |                                            |                       |                                            |                                           |                     |                                            |
| 18 years<br>and older                                         | 27.9<br>(27.3-28.6)                                   | 29.7<br>(29.2-30.2) | 0.28<br>(0.16 - 0.40)                      | 92.9<br>(91.4-94.4)                        | 97.3<br>(95.6-99.1)   | 0.25<br>(0.14 - 0.37)                      | 1714<br>(1664-1764)                       | 1791<br>(1753-1828) | 0.27<br>(0.02-0.52)                        |
| 18-39<br>years                                                | 26.7<br>(25.6-27.8)                                   | 28.5<br>(27.7-29.3) | 0.26<br>(0.03 - 0.49)                      | 87.4<br>(84.6-90.2)                        | 92.9<br>(90.4-95.4)   | 0.31<br>(0.11 - 0.51)                      | 1875<br>(1793-1958)                       | 1914<br>(1827-2001) | -0.04<br>(-0.52-0.44)                      |
| 40-64<br>years                                                | 29.5<br>(28.5-30.6)                                   | 30.7<br>(29.9-31.5) | 0.16<br>(-0.04 - 0.35)                     | 97.4<br>(95.3-99.6)                        | 100.4<br>(98.5-102.3) | 0.18<br>(0.03 - 0.33)                      | 1681<br>(1600-1762)                       | 1762<br>(1668-1855) | 0.29<br>(-0.14-0.72)                       |
| 65 years<br>and older                                         | 27.2<br>(26.6-27.9)                                   | 30.2<br>(29.2-31.2) | 0.50<br>(0.33 - 0.67)                      | 95.6<br>(93.7-97.5)                        | 100.9<br>(99.1-102.8) | 0.30<br>(0.17 - 0.43)                      | 1395<br>(1336-1454)                       | 1556<br>(1497-1616) | 0.63<br>(0.29-0.96)                        |
| Intermediate level of reported leisure-time physical activity |                                                       |                     |                                            |                                            |                       |                                            |                                           |                     |                                            |
| 18 years<br>and older                                         | 26.6<br>(26.2-27.0)                                   | 28.4<br>(27.9-28.8) | 0.39<br>(0.28 - 0.51)                      | 89.1<br>(88.2-90.0)                        | 94.7<br>(93.7-95.7)   | 0.38<br>(0.30 - 0.46)                      | 1776<br>(1738-1814)                       | 1783<br>(1714-1851) | 0.09<br>(-0.11-0.28)                       |
| 18-39<br>years                                                | 25.4<br>(24.9-25.9)                                   | 27.9<br>(26.9-29.0) | 0.50<br>(0.33 - 0.68)                      | 83.8<br>(82.6-84.9)                        | 92.2<br>(89.9-94.5)   | 0.53<br>(0.41 - 0.65)                      | 1969<br>(1889-2050)                       | 1757<br>(1663-1852) | -0.27<br>(-0.60-0.06)                      |
| 40-64<br>years                                                | 27.7<br>(27.2-28.2)                                   | 28.8<br>(27.7-29.9) | 0.32<br>(0.15 - 0.49)                      | 92.4<br>(91.1-93.7)                        | 96.5<br>(94.1-98.9)   | 0.28<br>(0.16 - 0.41)                      | 1702<br>(1665-1739)                       | 1874<br>(1776-1972) | 0.38<br>(0.13-0.64)                        |
| 65 years<br>and older                                         | 26.9<br>(26.4-27.4)                                   | 28.3<br>(26.3-30.3) | 0.26<br>(0.06 - 0.47)                      | 94.3<br>(93.0-95.6)                        | 96.5<br>(91.5-101.6)  | 0.14<br>(-0.02 - 0.29)                     | 1478<br>(1427-1530)                       | 1627<br>(1392-1861) | 0.41<br>(0.00-0.82)                        |
| Ideal level of reported leisure-time physical activity        |                                                       |                     |                                            |                                            |                       |                                            |                                           |                     |                                            |
| 18 years<br>and older                                         | 25.5<br>(25.2-25.7)                                   | 26.7<br>(26.1-27.2) | 0.28<br>(0.16 - 0.39)                      | 86.0<br>(85.2-86.7)                        | 90.5<br>(89.2-91.8)   | 0.33<br>(0.25 - 0.41)                      | 1765<br>(1722-1808)                       | 1774<br>(1705-1843) | 0.08<br>(-0.13-0.30)                       |
| 18-39<br>years                                                | 24.3<br>(23.9-24.7)                                   | 26.6<br>(25.4-27.8) | 0.48<br>(0.32 - 0.65)                      | 80.9<br>(79.9-81.8)                        | 88.5<br>(85.9-91.2)   | 0.52<br>(0.39 - 0.64)                      | 1926<br>(1856-1996)                       | 1892<br>(1795-1988) | -0.12<br>(-0.42-0.18)                      |
| 40-64<br>years                                                | 26.5<br>(26.1-26.9)                                   | 26.8<br>(25.9-27.6) | 0.10<br>(-0.08 - 0.28)                     | 89.2<br>(87.8-90.5)                        | 91.6<br>(89.6-93.6)   | 0.20<br>(0.06 - 0.33)                      | 1697<br>(1616-1779)                       | 1719<br>(1603-1835) | 0.18<br>(-0.23-0.59)                       |
| 65 years<br>and older                                         | 25.9<br>(25.4-26.3)                                   | 26.6<br>(25.2-27.9) | 0.12<br>(-0.06 - 0.31)                     | 90.8<br>(89.7-91.9)                        | 92.8<br>(90.6-95.0)   | 0.13<br>(0.01 - 0.24)                      | 1530<br>(1472-1588)                       | 1616<br>(1508-1723) | 0.41<br>(0.07-0.75)                        |

| <b>Men</b>                                                    |                     |                     |                        |                        |                        |                        |                     |                     |                        |
|---------------------------------------------------------------|---------------------|---------------------|------------------------|------------------------|------------------------|------------------------|---------------------|---------------------|------------------------|
| No reported leisure-time physical activity                    |                     |                     |                        |                        |                        |                        |                     |                     |                        |
| 18 years and older                                            | 26.6<br>(26.1-27.1) | 29.2<br>(28.6-29.8) | 0.52<br>(0.37 - 0.66)  | 96.1<br>(94.4-97.8)    | 102.6<br>(100.9-104.2) | 0.35<br>(0.23 - 0.47)  | 2438<br>(2343-2533) | 2487<br>(2384-2589) | 0.19<br>(-0.14-0.53)   |
| 18-39 years                                                   | 26.0<br>(25.0-26.9) | 28.4<br>(27.6-29.3) | 0.44<br>(0.20 - 0.67)  | 90.7<br>(88.1-93.2)    | 97.8<br>(95.3-100.2)   | 0.32<br>(0.13 - 0.51)  | 2714<br>(2536-2891) | 2663<br>(2492-2834) | -0.06<br>(-0.63-0.50)  |
| 40-64 years                                                   | 27.6<br>(26.8-28.4) | 29.8<br>(29.0-30.6) | 0.52<br>(0.32 - 0.71)  | 100.1<br>(97.5-102.7)  | 105.2<br>(103.0-107.4) | 0.34<br>(0.18 - 0.51)  | 2471<br>(2322-2620) | 2548<br>(2428-2669) | 0.34<br>(-0.15-0.83)   |
| 65 years and older                                            | 25.9<br>(25.1-26.7) | 29.4<br>(28.9-29.9) | 0.66<br>(0.51 - 0.81)  | 99.7<br>(97.7-101.8)   | 108.1<br>(107.1-109.2) | 0.43<br>(0.32 - 0.53)  | 1679<br>(1595-1762) | 1903<br>(1820-1986) | 0.38<br>(-0.02-0.77)   |
| Intermediate level of reported leisure-time physical activity |                     |                     |                        |                        |                        |                        |                     |                     |                        |
| 18 years and older                                            | 27.0<br>(26.7-27.4) | 28.3<br>(27.6-28.9) | 0.28<br>(0.17 - 0.38)  | 97.1<br>(96.3-97.9)    | 100.0<br>(98.3-101.7)  | 0.21<br>(0.14 - 0.29)  | 2636<br>(2576-2695) | 2532<br>(2408-2655) | -0.13<br>(-0.34-0.09)  |
| 18-39 years                                                   | 25.8<br>(25.3-26.2) | 28.0<br>(26.6-29.5) | 0.37<br>(0.21 - 0.52)  | 91.2<br>(90.0-92.3)    | 96.3<br>(93.0-99.7)    | 0.29<br>(0.17 - 0.41)  | 2972<br>(2864-3080) | 2710<br>(2483-2937) | -0.36<br>(-0.68--0.03) |
| 40-64 years                                                   | 28.2<br>(27.7-28.7) | 28.9<br>(28.0-29.8) | 0.21<br>(0.05 - 0.37)  | 101.2<br>(100.1-102.3) | 102.9<br>(100.8-105.1) | 0.15<br>(0.04 - 0.26)  | 2548<br>(2466-2631) | 2537<br>(2337-2738) | 0.10<br>(-0.21-0.40)   |
| 65 years and older                                            | 27.3<br>(26.8-27.9) | 27.4<br>(25.9-28.9) | 0.14<br>(-0.05 - 0.33) | 102.1<br>(100.5-103.7) | 101.9<br>(98.1-105.8)  | 0.12<br>(-0.02 - 0.27) | 2015<br>(1934-2096) | 2077<br>(1818-2336) | -0.03<br>(-0.44-0.39)  |
| Ideal level of reported leisure-time physical activity        |                     |                     |                        |                        |                        |                        |                     |                     |                        |
| 18 years and older                                            | 26.2<br>(25.9-26.4) | 28.0<br>(27.5-28.6) | 0.35<br>(0.26 - 0.44)  | 93.9<br>(93.2-94.5)    | 98.2<br>(96.7-99.7)    | 0.25<br>(0.18 - 0.32)  | 2639<br>(2579-2699) | 2536<br>(2452-2620) | -0.22<br>(-0.40--0.04) |
| 18-39 years                                                   | 25.5<br>(25.1-25.9) | 27.5<br>(26.6-28.3) | 0.37<br>(0.24 - 0.50)  | 89.0<br>(87.9-90.0)    | 93.6<br>(91.6-95.6)    | 0.28<br>(0.17 - 0.38)  | 3023<br>(2912-3134) | 2678<br>(2564-2792) | -0.60<br>(-0.87--0.32) |
| 40-64 years                                                   | 26.7<br>(26.4-27.1) | 28.7<br>(27.9-29.6) | 0.35<br>(0.21 - 0.49)  | 96.6<br>(95.7-97.4)    | 100.9<br>(98.9-102.9)  | 0.24<br>(0.13 - 0.34)  | 2491<br>(2395-2587) | 2585<br>(2447-2722) | 0.23<br>(-0.09-0.55)   |
| 65 years and older                                            | 26.4<br>(26.0-26.7) | 27.8<br>(27.0-28.6) | 0.28<br>(0.15 - 0.42)  | 99.5<br>(98.4-100.5)   | 103.1<br>(100.4-105.8) | 0.22<br>(0.11 - 0.34)  | 2047<br>(1981-2113) | 2066<br>(1942-2191) | 0.06<br>(-0.29-0.41)   |

Appendix Table 5: Relative increase in body-mass index and waist circumference in “Intermediate” and “No reported” groups compared to “Ideal” reported leisure time physical activity in U.S. adults, 1988-2010.

|                    | Relative increase in <b>BMI</b> compared to <b>Ideal level</b> of Reported leisure time physical activity |                                 | Relative increase in <b>waist circumference</b> compared to <b>Ideal level</b> of Reported leisure time physical activity |                                 |
|--------------------|-----------------------------------------------------------------------------------------------------------|---------------------------------|---------------------------------------------------------------------------------------------------------------------------|---------------------------------|
|                    | Intermediate<br>Percent Change (95% CI)                                                                   | None<br>Percent Change (95% CI) | Intermediate<br>Percent Change (95% CI)                                                                                   | None<br>Percent Change (95% CI) |
| <b>Women</b>       |                                                                                                           |                                 |                                                                                                                           |                                 |
| non-Hispanic white | 6.14 (4.64 - 7.65)                                                                                        | 8.75 (7.26 - 10.25)             | 4.63 (3.57 - 5.70)                                                                                                        | 7.19 (6.02 - 8.37)              |
| non-Hispanic black | 1.10 (-2.11 - 4.41)                                                                                       | 0.65 (-2.17 - 3.55)             | 1.28 (-1.03 - 3.66)                                                                                                       | 1.10 (-1.10 - 3.36)             |
| Mexican-American   | 3.49 (0.62 - 6.44)                                                                                        | 5.06 (2.78 - 7.40)              | 2.83 (0.60 - 5.10)                                                                                                        | 3.73 (2.08 - 5.41)              |
| <b>Men</b>         |                                                                                                           |                                 |                                                                                                                           |                                 |
| non-Hispanic white | 1.36 (0.26 - 2.46)                                                                                        | 2.52 (1.25 - 3.82)              | 2.10 (1.28 - 2.93)                                                                                                        | 3.36 (2.40 - 4.33)              |
| non-Hispanic black | 0.10 (-2.76 - 3.03)                                                                                       | -2.21 (-4.38 - 0.00)            | 2.01 (-0.45 - 4.53)                                                                                                       | 0.22 (-1.51 - 1.98)             |
| Mexican-American   | 0.39 (-2.04 - 2.88)                                                                                       | 1.62 (-0.81 - 4.11)             | 0.55 (-1.10 - 2.23)                                                                                                       | 1.16 (-0.59 - 2.95)             |

Appendix Table 6: Annual changes in daily intake of fat, carbohydrate and protein, stratified by reported level of leisure-time physical activity, U.S. adults, 1988-2010.

|                    | Reported level of leisure-time physical activity |                                            |                                       |                                  |                                            |                                       |                                  |                                            |                                       |
|--------------------|--------------------------------------------------|--------------------------------------------|---------------------------------------|----------------------------------|--------------------------------------------|---------------------------------------|----------------------------------|--------------------------------------------|---------------------------------------|
|                    | None                                             |                                            |                                       | Intermediate                     |                                            |                                       | Ideal                            |                                            |                                       |
|                    | Mean fat intake in g/day(95% CI)                 | Mean carbohydrate intake in g/day (95% CI) | Mean protein intake in g/day (95% CI) | Mean fat intake in g/day(95% CI) | Mean carbohydrate intake in g/day (95% CI) | Mean protein intake in g/day (95% CI) | Mean fat intake in g/day(95% CI) | Mean carbohydrate intake in g/day (95% CI) | Mean protein intake in g/day (95% CI) |
| <b>Women</b>       |                                                  |                                            |                                       |                                  |                                            |                                       |                                  |                                            |                                       |
| 18 years and older |                                                  |                                            |                                       |                                  |                                            |                                       |                                  |                                            |                                       |
| 1988-1994          | 66 (64 - 68)                                     | 216 (209 - 224)                            | 64 (62 - 67)                          | 69 (67 - 71)                     | 219 (213 - 225)                            | 66 (64 - 68)                          | 65 (63 - 68)                     | 225 (220 - 230)                            | 67 (65 - 69)                          |
| 2009-2010          | 67 (65 - 68)                                     | 228 (223 - 233)                            | 67 (66 - 69)                          | 67 (63 - 72)                     | 224 (217 - 231)                            | 68 (64 - 72)                          | 65 (62 - 68)                     | 222 (212 - 232)                            | 69 (67 - 71)                          |
| Trend              | APC 0.26 (-0.07 - 0.59)                          | APC 0.21 (-0.07 - 0.49)                    | APC 0.50 (0.18 - 0.81)                | APC -0.02 (-0.32 - 0.28)         | APC 0.18 (-0.03 - 0.39)                    | APC 0.22 (-0.03 - 0.48)               | APC 0.45 (0.11 - 0.78)           | APC -0.19 (-0.44 - 0.07)                   | APC 0.26 (0.02 - 0.49)                |
| 18-39 years        |                                                  |                                            |                                       |                                  |                                            |                                       |                                  |                                            |                                       |
| 1988-1994          | 72 (67 - 76)                                     | 238 (228 - 248)                            | 68 (64 - 73)                          | 77 (73 - 81)                     | 240 (229 - 251)                            | 71 (67 - 74)                          | 71 (68 - 75)                     | 244 (234 - 254)                            | 70 (67 - 72)                          |
| 2009-2010          | 71 (67 - 75)                                     | 245 (235 - 256)                            | 68 (65 - 72)                          | 64 (58 - 69)                     | 227 (214 - 240)                            | 66 (61 - 71)                          | 69 (64 - 73)                     | 239 (227 - 250)                            | 72 (70 - 75)                          |
| Trend              | APC -0.15 (-0.79 - 0.49)                         | APC -0.03 (-0.57 - 0.51)                   | APC 0.37 (-0.26 - 1.00)               | APC -0.55 (-1.03 - -0.07)        | APC -0.04 (-0.41 - 0.33)                   | APC -0.10 (-0.51 - 0.30)              | APC 0.18 (-0.26 - 0.62)          | APC -0.36 (-0.71 - 0.00)                   | APC 0.22 (-0.16 - 0.59)               |
| 40-64 years        |                                                  |                                            |                                       |                                  |                                            |                                       |                                  |                                            |                                       |
| 1988-1994          | 65 (61 - 69)                                     | 208 (198 - 219)                            | 64 (59 - 68)                          | 67 (64 - 69)                     | 208 (202 - 214)                            | 65 (63 - 67)                          | 64 (59 - 68)                     | 214 (204 - 224)                            | 66 (63 - 69)                          |
| 2009-2010          | 65 (61 - 69)                                     | 223 (211 - 235)                            | 69 (65 - 73)                          | 71 (66 - 76)                     | 233 (222 - 244)                            | 72 (66 - 77)                          | 63 (59 - 67)                     | 212 (192 - 232)                            | 68 (64 - 71)                          |
| Trend              | APC 0.11 (-0.48 - 0.70)                          | APC 0.31 (-0.14 - 0.75)                    | APC 0.52 (0.01 - 1.03)                | APC 0.26 (-0.12 - 0.63)          | APC 0.50 (0.20 - 0.79)                     | APC 0.53 (0.21 - 0.84)                | APC 0.53 (-0.03 - 1.09)          | APC -0.16 (-0.66 - 0.34)                   | APC 0.30 (-0.10 - 0.71)               |
| 65 years and older |                                                  |                                            |                                       |                                  |                                            |                                       |                                  |                                            |                                       |
| 1988-1994          | 52 (49 - 54)                                     | 182 (174 - 190)                            | 55 (52 - 58)                          | 54 (51 - 57)                     | 193 (185 - 202)                            | 58 (56 - 60)                          | 54 (50 - 57)                     | 203 (195 - 211)                            | 62 (59 - 65)                          |



|                    |                             |                             |                            |                             |                             |                             |                              |                              |                             |
|--------------------|-----------------------------|-----------------------------|----------------------------|-----------------------------|-----------------------------|-----------------------------|------------------------------|------------------------------|-----------------------------|
| 2009-2010          | 59 (56 - 63)                | 197 (188 - 205)             | 61 (58 - 64)               | 67 (55 - 79)                | 194 (165 - 224)             | 64 (56 - 71)                | 60 (55 - 64)                 | 205 (192 - 218)              | 64 (58 - 70)                |
| Trend              | APC 1.02<br>(0.43 - 1.61)   | APC 0.37<br>(0.03 - 0.71)   | APC 0.62<br>(0.19 - 1.05)  | APC 1.01<br>(0.47 - 1.54)   | APC -0.01<br>(-0.47 - 0.45) | APC 0.44<br>(-0.01 - 0.90)  | APC 0.97<br>(0.48 - 1.46)    | APC 0.20<br>(-0.14 - 0.54)   | APC 0.26<br>(-0.16 - 0.68)  |
| <b>Men</b>         |                             |                             |                            |                             |                             |                             |                              |                              |                             |
| 18 years and older |                             |                             |                            |                             |                             |                             |                              |                              |                             |
| 1988-1994          | 95 (90 - 100)               | 293 (278 - 308)             | 92 (89 - 96)               | 102 (99 - 106)              | 309 (301 - 317)             | 100 (97 - 103)              | 100 (97 - 104)               | 320 (311 - 329)              | 99 (97 - 102)               |
| 2009-2010          | 93 (88 - 98)                | 296 (284 - 308)             | 97 (92 - 102)              | 96 (91 - 101)               | 305 (288 - 321)             | 96 (91 - 101)               | 93 (88 - 97)                 | 297 (287 - 308)              | 102 (99 - 105)              |
| Trend              | APC 0.22<br>(-0.23 - 0.67)  | APC 0.04<br>(-0.35 - 0.43)  | APC 0.37<br>(0.00 - 0.75)  | APC -0.13<br>(-0.41 - 0.15) | APC -0.12<br>(-0.36 - 0.13) | APC 0.07<br>(-0.19 - 0.32)  | APC -0.31<br>(-0.59 - -0.02) | APC -0.41<br>(-0.62 - -0.20) | APC 0.17<br>(-0.01 - 0.34)  |
| 18-39 years        |                             |                             |                            |                             |                             |                             |                              |                              |                             |
| 1988-1994          | 105 (96 - 115)              | 323 (299 - 348)             | 101 (94 - 107)             | 115 (110 - 119)             | 346 (335 - 358)             | 110 (105 - 114)             | 116 (111 - 122)              | 363 (348 - 378)              | 111 (106 - 116)             |
| 2009-2010          | 95 (87 - 103)               | 326 (307 - 345)             | 102 (93 - 110)             | 101 (89 - 113)              | 327 (298 - 356)             | 100 (90 - 110)              | 94 (89 - 99)                 | 324 (308 - 340)              | 106 (102 - 110)             |
| Trend              | APC -0.30<br>(-1.09 - 0.50) | APC -0.23<br>(-0.79 - 0.34) | APC 0.30<br>(-0.39 - 1.00) | APC -0.43<br>(-0.85 - 0.00) | APC -0.27<br>(-0.60 - 0.05) | APC -0.13<br>(-0.54 - 0.28) | APC -0.93<br>(-1.34 - -0.53) | APC -0.64<br>(-0.94 - -0.34) | APC -0.17<br>(-0.45 - 0.11) |
| 40-64 years        |                             |                             |                            |                             |                             |                             |                              |                              |                             |
| 1988-1994          | 97 (89 - 105)               | 297 (273 - 321)             | 95 (89 - 101)              | 100 (95 - 105)              | 297 (285 - 310)             | 99 (95 - 103)               | 94 (88 - 99)                 | 302 (287 - 316)              | 95 (91 - 98)                |
| 2009-2010          | 99 (94 - 104)               | 293 (275 - 311)             | 100 (94 - 106)             | 97 (88 - 105)               | 304 (278 - 329)             | 98 (88 - 108)               | 97 (89 - 105)                | 292 (276 - 308)              | 106 (101 - 112)             |
| Trend              | APC 0.56<br>(-0.10 - 1.21)  | APC 0.19<br>(-0.43 - 0.81)  | APC 0.45<br>(-0.05 - 0.95) | APC 0.16<br>(-0.24 - 0.57)  | APC 0.01<br>(-0.38 - 0.40)  | APC 0.28<br>(-0.09 - 0.65)  | APC 0.37<br>(-0.08 - 0.83)   | APC -0.13<br>(-0.50 - 0.23)  | APC 0.68<br>(0.35 - 1.01)   |
| 65 years and older |                             |                             |                            |                             |                             |                             |                              |                              |                             |
| 1988-1994          | 62 (57 - 67)                | 209 (194 - 225)             | 67 (62 - 71)               | 78 (73 - 82)                | 245 (234 - 256)             | 78 (75 - 82)                | 76 (72 - 79)                 | 255 (245 - 264)              | 81 (77 - 84)                |
| 2009-2010          | 72 (68 - 76)                | 228 (216 - 240)             | 76 (73 - 80)               | 82 (68 - 95)                | 250 (216 - 285)             | 80 (70 - 90)                | 80 (73 - 86)                 | 243 (225 - 262)              | 83 (77 - 89)                |
| Trend              | APC 0.48<br>(-0.03 - 1.00)  | APC 0.24<br>(-0.28 - 0.76)  | APC 0.35<br>(-0.11 - 0.81) | APC -0.02<br>(-0.59 - 0.55) | APC 0.05<br>(-0.45 - 0.56)  | APC 0.08<br>(-0.33 - 0.49)  | APC 0.34<br>(-0.11 - 0.78)   | APC -0.23<br>(-0.62 - 0.17)  | APC 0.13<br>(-0.26 - 0.52)  |

APC = annual percentage change

Appendix Figure 1

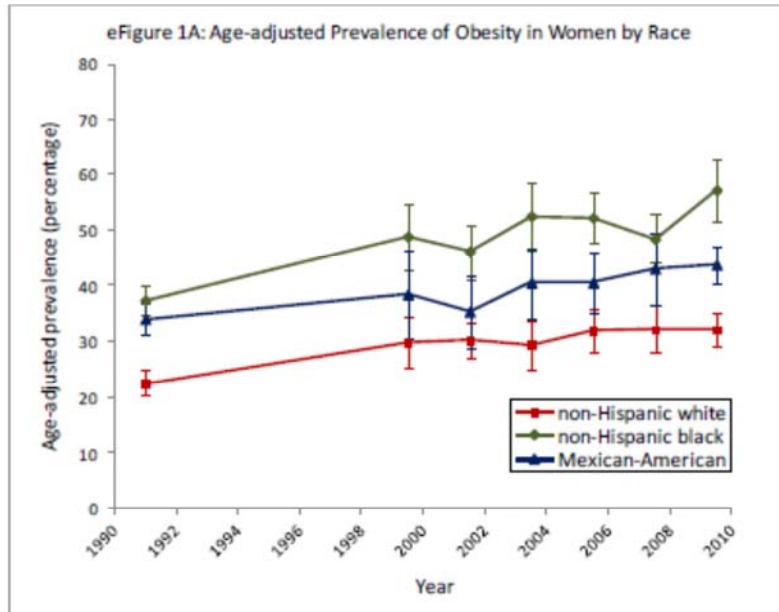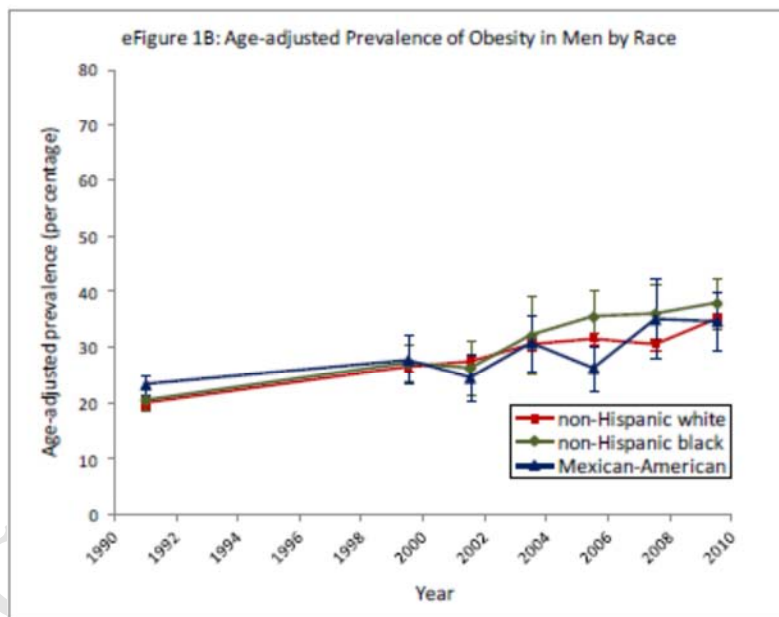

Appendix Figure 2

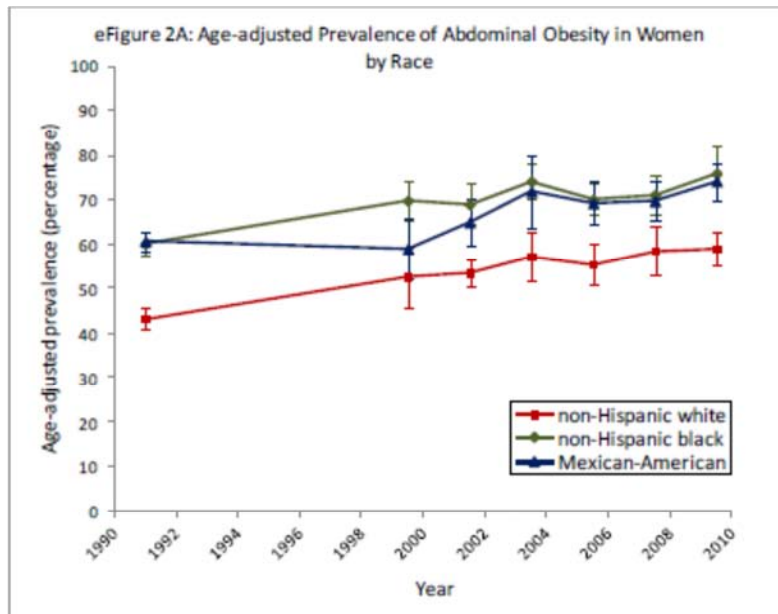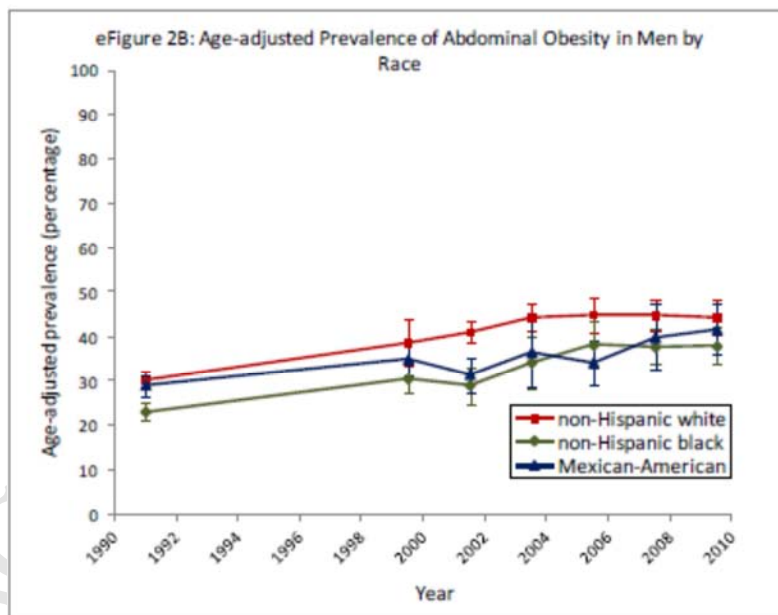

## REFERENCES

1. Beddhu S, Baird BC, Zitterkoph J, Neilson J, Greene T. Physical activity and mortality in chronic kidney disease (NHANES III). *Clin J Am Soc Nephrol*. Dec 2009;4(12):1901-1906.
2. U.S. Department of Health and Human Services. Physical Activity Guidelines Advisory Committee final report. Accessed April 17, 2013 at <http://www.health.gov/PAGuidelines/Report/Default.aspx>.
3. Kim HJ, Fay MP, Feuer EJ, Midthune DN. Permutation tests for joinpoint regression with applications to cancer rates. *Stat Med*. Feb 15 2000;19(3):335-351.
4. JoinPoint Regression Program, Version 4.0.1 - January 2013; Statistical Methodology and Applications Branch and Data Modeling Branch, Surveillance Research Program National Cancer Institute. Accessed April 17, 2013 at <http://surveillance.cancer.gov/joinpoint/>.
5. Johansson I, Nilsson LM, Stegmayr B, Boman K, Hallmans G, Winkvist A. Associations among 25-year trends in diet, cholesterol and BMI from 140,000 observations in men and women in Northern Sweden. *Nutrition journal*. 2012;11:40.
